# Supplementary material for: Review of Experimental Studies to Improve Radiotherapy Response in Bladder Cancer: Comments and Perspectives
Source: PubMed Central journal article supplement (PMC7795454; doi:10.3390/cancers13010087), 2020-12-30
Supplement: cancers-13-00087-s001.pdf [file cancers-13-00087-s001.pdf]

**Table S1.** Clinical trials of concurrent chemoradiotherapy in bladder cancer.

| Study                         | Patient number and characteristics | Study design                                                                                                                                                                                                                                                                     | Outcome                                                                                                                                                                                                                           | Ref. |
|-------------------------------|------------------------------------|----------------------------------------------------------------------------------------------------------------------------------------------------------------------------------------------------------------------------------------------------------------------------------|-----------------------------------------------------------------------------------------------------------------------------------------------------------------------------------------------------------------------------------|------|
| Shipley <i>et al.</i> , 1987  | 70 T2-T4 MIBC patients             | RT + cisplatin on a multi-institutional prospective protocol.                                                                                                                                                                                                                    | Complete response rate: 77% in the 62 patients completing planned irradiation and 70% for all patients.                                                                                                                           | [1]  |
| Housset <i>et al.</i> , 1993  | 54 T2 -T4 MIBC patients            | TUR + 5-FU-cisplatin combination + RT. A control cystoscopy was performed 6 weeks after completion of the neoadjuvant program. Patients with persistent tumor underwent cystectomy. Complete responders were treated by either additional CRT (group A) or cystectomy (group B). | At control cystoscopy, 74% had a histologically documented complete response. Metastatic disease in 16 patients, more frequently in the nonresponders (71%) than in responders (15%). Disease-free survival rate at 3 years: 62%. | [2]  |
| Coppin <i>et al.</i> , 1996   | 99 T2-T4b N0 MIBC patients         | Fractionated RT + intravenous cisplatin 100 mg/m <sup>2</sup> at 2-week intervals for three cycles vs RT alone.                                                                                                                                                                  | Complete response: 47 vs 31%. 3-year overall survival 47 vs 33%; 5-year locoregional relapse rate 40 vs 59% (p = 0.04); bladder preservation 70 vs 36%.                                                                           | [3]  |
| James <i>et al.</i> , 2012.   | 360 MIBC patients                  | RT with or without synchronous chemotherapy. 5-FU (500 mg/mer day) during fractions 1 to 5 and 16 to 20 of RT+ mitomycin C (12 mg/m <sup>2</sup> ) on day 1.                                                                                                                     | 2 year locoregional disease-free survival: 67% in the CRT group and 54% in the RT group. 5-year OS: 48% in the CRT group and 35% in the RT.                                                                                       | [4]  |
| Thompson <i>et al.</i> , 2017 | 78 patients with MIBC              | Concurrent CRT with gemcitabine (GemX) with or without neoadjuvant chemotherapy (neoGemX).                                                                                                                                                                                       | Only 49 patients included. No significant difference between mean scores at baseline and 12 months after treatment completion or between the neoGemX and GemX groups.                                                             | [6]  |

|                                    |                                                      |                                                                                                                                                                                                                                                              |                                                                                                                                                                                                                                                                                                 |      |
|------------------------------------|------------------------------------------------------|--------------------------------------------------------------------------------------------------------------------------------------------------------------------------------------------------------------------------------------------------------------|-------------------------------------------------------------------------------------------------------------------------------------------------------------------------------------------------------------------------------------------------------------------------------------------------|------|
| Hoskin <i>et al.</i> ,<br>2010.    | 333 patients with locally advanced bladder carcinoma | RT alone versus RT with carbogen and nicotinamide (CON). The primary end point was cystoscopic control at 6 months (CC <sub>6m</sub> ) and secondary end points were overall survival (OS), local relapse-free survival (RFS), urinary and rectal morbidity. | CC <sub>6m</sub> : 81% for RT + CON and 76% for RT alone (P .3); however, just more than half of patients underwent cystoscopy at that time. In multivariate analysis: RT CON significantly reduced risk of relapse (P .05) and death (P .03); no differences in late urinary or GI morbidity . | [7]  |
| Murthy <i>et al.</i> ,<br>2016     | 44 patients with localized bladder cancer.           | TURBT + concurrent platinum based CT receiving either prophylactic nodal RT or escalated dose to the tumour bed.                                                                                                                                             | Locoregional control (87% vs 68%, p= 0.748) and overall survival (74% vs 60%, p=0.36) were better in patients receiving dose escalation.                                                                                                                                                        | [22] |
| Efstathiou <i>et al.</i> ,<br>2012 | 348 MIBC patients with T2-4a                         | Concurrent cisplatin-based CCRT after TURBT plus neoadjuvant or adjuvant chemotherapy. Repeat biopsy after 40 Gy, initial tumor response guiding subsequent therapy: CRT boost or cystectomy.                                                                | Median follow-up: 7.7 yr. Multivariate analyses: CR (72%) significantly associated with improved DSS and OS. No patient required cystectomy for treatment-related toxicity.                                                                                                                     | [34] |

**Table S2.** Characteristics of BCa cell lines used in RT studies.

| Cell line        | Cellosaurus accession nr | <i>In vitro</i> | <i>In vivo</i> | Gender | Age | Grade | Stage            | Ras Mut | p53 Mut | TERT-promoter Mut | FGFR3 gene alteration | Ref.  | Part of UBC-40 <sup>1</sup> | Part of CCLÉ <sup>2</sup> | Molecular classification [47] | Molecular classification [46] |
|------------------|--------------------------|-----------------|----------------|--------|-----|-------|------------------|---------|---------|-------------------|-----------------------|-------|-----------------------------|---------------------------|-------------------------------|-------------------------------|
| T24              | CVCL_0554                | 39              | 4              | F      | 82Y | G3    | pT <sub>a</sub>  | X       | X       | X                 | wt                    | [121] | X                           | X                         | basal                         | non-luminal, non-basal        |
| RT112            | CVCL_1670                | 25              | 4              | F      | n/a | G2    | pT <sub>a</sub>  | wt      | X       | m/r               | m/r                   | [122] | X                           | X                         | luminal                       | luminal                       |
| 5637             | CVCL_0126                | 11              | 3              | M      | 68Y | G2    | n/a              | wt      | X       | wt                | wt                    | [123] | X                           | X                         | mixed                         | basal                         |
| RT4 <sup>3</sup> | CVCL_0036                | 8               | 2              | M      | 63Y | G1-2  | n/a <sup>3</sup> | wt      | X       | X                 | m/r                   | [124] | X                           | X                         | luminal                       | luminal                       |
| UMUC3            | CVCL_1783                | 7               | 2              | M      | n/a | n/a   | pT2-T4           | X       | X       | X                 | wt                    | [125] | X                           | X                         | basal                         | non-luminal, non-basal        |
| HT1376           | CVCL_1292                | 5               | 0              | F      | 58Y | G3    | ≥ pT2            | wt      | X       | X                 | wt                    | [126] | X                           | X                         | mixed                         | basal                         |
| 647V             | CVCL_1049                | 4               | 0              | M      | 59Y | G2    | pT2/3a           | wt      | X       | X                 | m/r                   | [127] | -                           | X                         | basal                         | basal                         |
| J82              | CVCL_0359                | 3               | 1              | M      | 58Y | G3    | pT3              | wt      | X       | X                 | m/r                   | [128] | X                           | X                         | basal                         | non-luminal, non-basal        |
| HT1197           | CVCL_1291                | 3               | 0              | M      | 44Y | G4    | pT2              | wt      | m/r     | X                 | X                     | [126] | X                           | X                         | mixed                         | basal                         |
| KK47             | CVCL_8253                | 1               | 1              | M      | 50Y | G1    | n/a              | wt      | wt      | wt                | wt                    | [129] | X                           | -                         | n/a                           | non-luminal, non-basal        |
| SW780            | CVCL_1728                | 1               | 1              | F      | 80Y | G1    | n/a              | wt      | wt      | X                 | m/r                   | [130] | X                           | X                         | luminal                       | luminal                       |
| CAL29            | CVCL_1808                | 2               | 0              | F      | 80Y | G4    | pT2              | wt      | X       | X                 | wt                    | [131] | -                           | X                         | luminal                       | n/c                           |
| 253J B-V         | CVCL_7937                | 2               | 0              | M      | 53Y | G4    | pT4              | wt      | wt      | m/r               | wt                    | [132] | X                           | X                         | basal                         | non-luminal, non-basal        |
| NTUB1            | CVCL_RW29                | 1               | 1              | F      | 70Y | n/a   | n/a              | wt      | wt      | wt                | wt                    | [133] | -                           | -                         | n/a                           | n/a                           |
| UCRU-BL13        | CVCL_M873                | 1               | 0              | M      | 62Y | n/a   | n/a              | wt      | wt      | wt                | wt                    | [134] | -                           | -                         | n/a                           | n/a                           |
| UCRU-BL17        | CVCL_M007                | 1               | 0              | F      | 69Y | n/a   | n/a              | wt      | X       | wt                | wt                    | [135] | -                           | -                         | n/a                           | n/a                           |
| UCRU-BL28        | CVCL_4904                | 1               | 0              | M      | 62Y | n/a   | n/a              | wt      | X       | wt                | wt                    | [136] | -                           | -                         | n/a                           | n/a                           |
| TCC-SUP          | CVCL_1738                | 2               | 0              | F      | 67Y | G4    | n/a              | wt      | X       | X                 | wt                    | [137] | X                           | X                         | basal                         | non-luminal, non-basal        |
| UMUC5            | CVCL_2750                | 1               | 0              | F      | n/a | n/a   | n/a              | wt      | X       | X                 | wt                    | [138] | X                           | -                         | basal-like                    | luminal                       |
| VMCUB1           | CVCL_1786                | 1               | 0              | M      | n/a | G2    | n/a              | wt      | X       | X                 | wt                    | [139] | X                           | X                         | basal                         | basal                         |
| KU19-19          | CVCL_1344                | 1               | 0              | M      | 76Y | n/a   | n/a              | n/a     | X       | X                 | wt                    | [139] | -                           | X                         | n/a                           | basal                         |
| UMUC6            | CVCL_2751                | 1               | 0              | M      | n/a | n/a   | n/a              |         | X       | n/a               | wt                    | [125] | X                           | -                         | mixed                         | basal                         |
| UMUC9            | CVCL_2753                | 1               | 0              | M      | n/a | n/a   | n/a              | n/a     | X       | X                 | n/a                   | [140] | X                           | -                         | Non-basal like                | luminal                       |
| SW-800           | CVCL_A684                | 1               | 0              | F      | n/a | n/a   | n/a              | n/a     | X       | X                 | n/a                   | [141] | X                           | -                         | Non-basal like                | n/a                           |
| 639-V            | CVCL_1048                | 1               | 0              | F      | n/a | n/a   | n/a              | n/a     | X       | X                 | n/a                   | [127] | X                           |                           | Basal-like                    | non-luminal, non-basal        |
| MB49             | CVCL_7076                | 3               | 0              | M      | n/a | n/a   | n/a              | n/a     | n/a     | n/a               | n/a                   | [142] | -                           | -                         | Mouse BCa cell lines          |                               |
| MB49-I           | CVCL_VL62                | 1               | 0              | M      | n/a | n/a   | n/a              | n/a     | n/a     | n/a               | n/a                   | [143] | -                           | -                         |                               |                               |

|             |           |   |   |   |     |     |     |     |     |     |     |       |   |   |  |
|-------------|-----------|---|---|---|-----|-----|-----|-----|-----|-----|-----|-------|---|---|--|
| <b>MBT2</b> | CVCL_4660 | 3 | 2 | F | n/a | n/a | n/a | n/a | n/a | n/a | n/a | [144] | - | - |  |
|-------------|-----------|---|---|---|-----|-----|-----|-----|-----|-----|-----|-------|---|---|--|

<sup>1</sup>UBC-40, a comprehensive genomic characterization of 40 urothelial bladder carcinoma (UBC) cell lines [47]; <sup>2</sup>CCLC, Cancer Cell Line Encyclopedia [145]; <sup>3</sup>RT4 cell line originates from re-occurring human transitional cell papilloma [124] *italic*: mouse BCa cell lines; abbreviations: n/a, information not available; n/c, not categorized (not coherent classification depending on the dataset used); m/r, mixed reports; wt, wild type; <sup>3</sup>Information from the <https://web.expasy.org/>. Abbreviations: TKI, tyrosine kinase inhibitor; n/a, information not available. Information in this table has been collected and updated of that from Zuiverloon *et al.* [48].

**Table S3.** Characteristics of problematic human BCa cell lines used in experimental RT studies.

| Cell line      | Cellosaurus accession no. | <i>In vitro</i> | <i>In vivo</i> | <i>Comment</i> <sup>1</sup>                                       |
|----------------|---------------------------|-----------------|----------------|-------------------------------------------------------------------|
| MGHU-1 (EJ138) | CVCL_2443                 | 8               | 0              | T24 derivative                                                    |
| S40b           | n/a                       | 4               | 0              | Parent cell line (MGHU-1) has been shown to be a T24 derivative   |
| ECV304         | CVCL_2029                 | 3               | 0              |                                                                   |
| EJ30           | CVCL_2443                 | 3               | 0              | Parent cell line (Ej138) has been shown to be a T24 derivative.   |
| biu87          | CVCL_6881                 | 3               | 0              | Contaminated by non-human cell                                    |
| KU7            | CVCL_4714                 | 1               | 1              | HeLa derivative                                                   |
| MGHU-2         | CVCL_9826                 | 1               | 0              | T24 derivative                                                    |
| TSGH 8301      | CVCL_A342                 | 1               | 1              | Contaminated by a cervix cancer cell line ME-180                  |
| TSU-Pr1        | CVCL_4014                 | 0               | 1              | Problematic cell line: Contaminated. Shown to be a T24 derivative |

<sup>1</sup>Information from the <https://web.expasy.org/>.

**Table S4.** Preclinical studies of problematic cell lines used in vivo.

| Cell line | Subtype                                                                              | IR regimen | Strategy of radiosensitisation                 | Sex | Mouse background | Initial tumour (mm <sup>3</sup> ) <sup>1</sup> | Study follow-up (days) <sup>2</sup> | Ref.  |
|-----------|--------------------------------------------------------------------------------------|------------|------------------------------------------------|-----|------------------|------------------------------------------------|-------------------------------------|-------|
| TSGH 8301 | Problematic cell line: Contaminated by a cervix cancer cell line ME-180 <sup>3</sup> | 1 x 10 Gy  | Mullberry Water Extract                        | M   | BALB/c nude      | 140                                            | 21                                  | [146] |
| TSU-Pr1   | Problematic cell line: Contaminated. Shown to be a T24 derivative <sup>3</sup>       | 1 x 5Gy    | Adenoviral vector-mediated GLIPR1 gene therapy | M   | BALB/c nude      | 100                                            | 72                                  | [147] |
| KU7       | Problematic cell line: Contaminated. Shown to be a HeLa derivative <sup>3</sup>      | 3 x 3Gy    | mTOR inhibitor                                 | F   | Athymic Nu/Nu    | Not mentioned                                  | ?                                   | [148] |

<sup>1</sup>The initial size of the tumour is defined as the size of the tumour at the start of the RT or combination treatment (Day 1); <sup>2</sup>The minimum follow-up for the non-treated control were used to compare the growth of the xenografts; <sup>3</sup>Information from the <https://web.expasy.org/>.
